# Supplementary material for: Fine silver sulfide–platinum nanocomposites supported on carbon substrates for the methanol oxidation reaction
Source: Royal Society of Chemistry journal article supplement (doi:10.1039/c6ra26630d), 2017-01-01
Supplement: c6ra26630d1.pdf [file c6ra26630d1.pdf]

## Electronic Supplementary Information

### **Fine silver sulfide-platinum nanocomposites supported on carbon substrates for methanol oxidation reaction**

Jiayi Tang,<sup>a,b</sup> Dong Chen,<sup>a</sup> Chengyin Li,<sup>a</sup> Xianfeng Yang,<sup>c</sup> Hui Liu<sup>a,d,\*</sup> and Jun Yang<sup>a,b,d,\*</sup>

<sup>a</sup> *State Key Laboratory of Multiphase Complex Systems, Institute of Process Engineering, Chinese Academy of Sciences, Beijing, China 100190. Tel: 86-10-8254 4917; Fax: 86-10-8254 4915; E-mail: [liuhui@ipe.ac.cn](mailto:liuhui@ipe.ac.cn) (H.L.); Tel: 86-10-8254 4915; Fax: 86-10-8254 4915; [jyang@ipe.ac.cn](mailto:jyang@ipe.ac.cn) (J. Y.)*

<sup>b</sup> *University of Chinese Academy of Sciences, No. 19A Yuquan Road, Beijing 100049, China*

<sup>c</sup> *Analytical and Testing Centre, South China University of Technology, Guangzhou 510640, China*

<sup>d</sup> *Center for Mesoscience, Institute of Process Engineering, Chinese Academy of Sciences, Beijing 100190, China*

Financial supports from the National Natural Science Foundation of China (Grant No.: 21376247, 21506225, 21573240), Center for Mesoscience, Institute of Process Engineering, Chinese Academy of Sciences (COM2015A001), New Faculty Start-up funding in South China University of Technology, and The Fundamental Research Funds for the Central Universities are gratefully acknowledged.

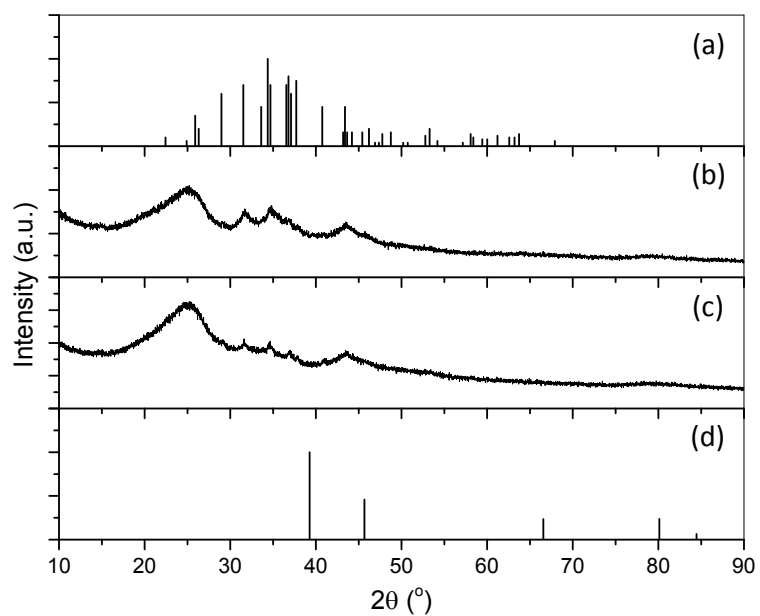

**Fig. S1** XRD patterns of  $\text{Ag}_2\text{S}$  reference with JCPDS Card No. of 140072 (a), carbon-supported  $\text{Ag}_2\text{S}$  nanocrystals (b), carbon-supported  $\text{Ag}_2\text{S}$ -Pt nanocomposites (c), and Pt reference with JCPDS Card No. of 882343, respectively.

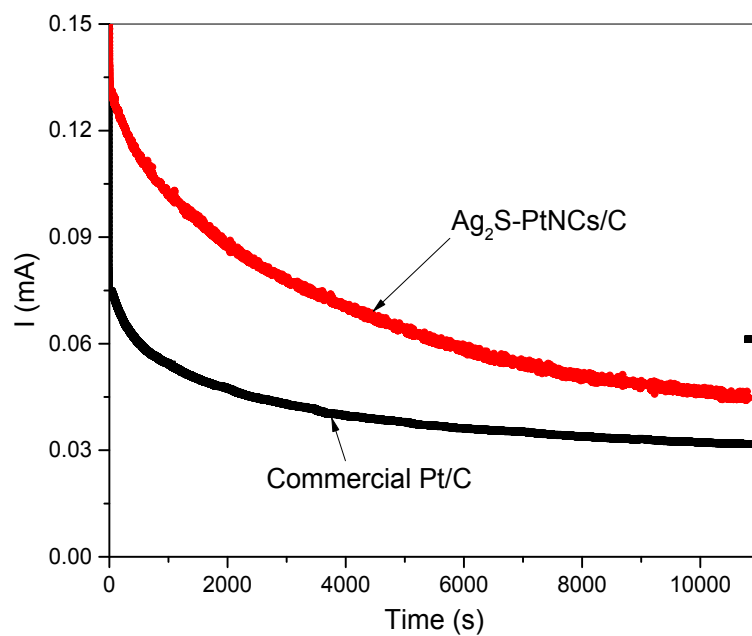

**Fig. S2** Chronoamperograms of the  $\text{Ag}_2\text{S}$ -PtNCs/C and commercial Pt/C catalysts at 0.45 V vs Ag/AgCl in argon-purged  $\text{HClO}_4$  (0.1 M) with 1 M methanol.

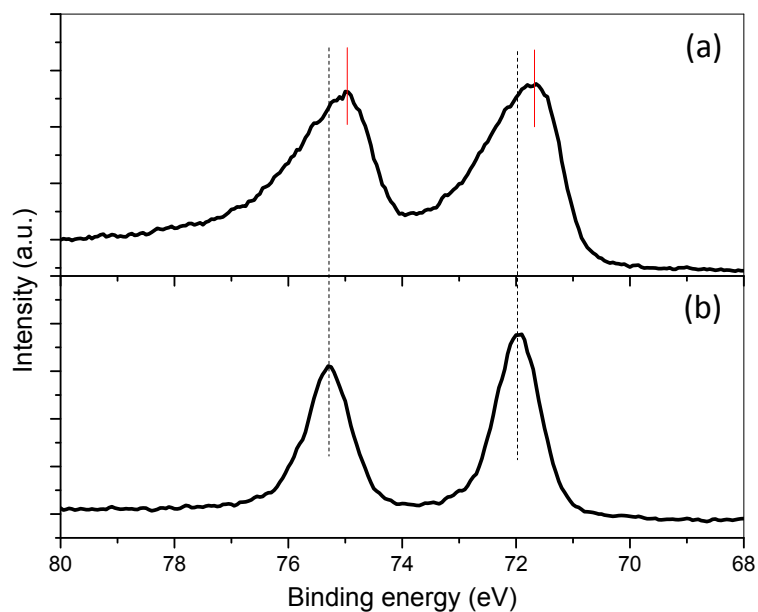

**Fig. S3** 4f XPS spectra of Pt in  $\text{Ag}_2\text{S-PtNCs/C}$  (a), and commercial Pt/C catalysts (b), in which the slight shift to lower value indicates the electronic coupling effect between the  $\text{Ag}_2\text{S}$  and Pt domains in the composite materials.

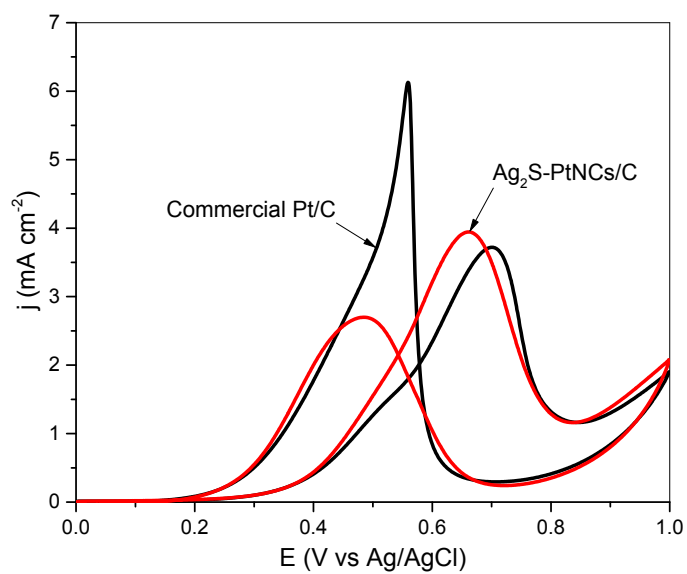

**Fig. S4** cyclic voltammograms of  $\text{Ag}_2\text{S-PtNCs/C}$  and commercial Pt/C catalysts in argon-purged  $\text{HClO}_4$  (0.1 M) with methanol (1 M) at a scan rate of  $20 \text{ mV s}^{-1}$  (b). The current densities were normalized by the geometric area ( $0.196 \text{ cm}^2$ ) of the glassy carbon electrode.
